# Supplementary material for: ortho-Metallated triphenylphosphine chalcogenide complexes of platinum and palladium: synthesis and catalytic activity
Source: Royal Society of Chemistry journal article supplement (doi:10.1039/c4dt01236d), 2014-06-19
Supplement: c4dt01236d1.pdf [file c4dt01236d1.pdf]

SUPPORTING INFORMATION

**ortho-Metallated triphenylphosphine chalcogenide complexes of platinum and palladium: synthesis and catalytic activity**

Steven H. Privér, Martin A. Bennett, Anthony C. Willis, Srinivas Pottabathula, M. Lakshmi Kantam and Suresh K. Bhargava

Table S1. Crystal and refinement data for complexes **1**, **2**, **4**, **8**, **9**, **11-14**, **16**, **17** and **20**.

|                                                               | <b>1</b>                                                        | <b>2</b>                                                                                                               | <b>4</b>                                                                                                               | <b>8</b>                                                                                     |
|---------------------------------------------------------------|-----------------------------------------------------------------|------------------------------------------------------------------------------------------------------------------------|------------------------------------------------------------------------------------------------------------------------|----------------------------------------------------------------------------------------------|
| Empirical formula                                             | C <sub>36</sub> H <sub>28</sub> P <sub>2</sub> PtS <sub>2</sub> | C <sub>36</sub> H <sub>28</sub> P <sub>2</sub> PtSe <sub>2</sub><br>·2(C <sub>2</sub> H <sub>4</sub> Cl <sub>2</sub> ) | C <sub>36</sub> H <sub>28</sub> P <sub>2</sub> PdSe <sub>2</sub><br>·2(C <sub>2</sub> H <sub>4</sub> Cl <sub>2</sub> ) | C <sub>40</sub> H <sub>34</sub> O <sub>4</sub> P <sub>2</sub> Pd <sub>2</sub> S <sub>2</sub> |
| Formula weight                                                | 781.79                                                          | 1073.49                                                                                                                | 984.80                                                                                                                 | 917.59                                                                                       |
| Temperature (K)                                               | 200(2)                                                          | 200(2)                                                                                                                 | 200(2)                                                                                                                 | 200(2)                                                                                       |
| Crystal system                                                | Monoclinic                                                      | Monoclinic                                                                                                             | Monoclinic                                                                                                             | Triclinic                                                                                    |
| Space group                                                   | <i>P</i> 2 <sub>1</sub> / <i>c</i>                              | <i>C</i> 2/ <i>c</i>                                                                                                   | <i>C</i> 2/ <i>c</i>                                                                                                   | <i>P</i> $\bar{1}$                                                                           |
| <i>a</i> (Å)                                                  | 9.6154(1)                                                       | 16.0935(4)                                                                                                             | 16.0798(2)                                                                                                             | 10.9570(1)                                                                                   |
| <i>b</i> (Å)                                                  | 19.0693(2)                                                      | 11.4059(2)                                                                                                             | 11.3798(2)                                                                                                             | 12.5765(2)                                                                                   |
| <i>c</i> (Å)                                                  | 17.4036(2)                                                      | 22.5098(4)                                                                                                             | 22.5745(3)                                                                                                             | 15.0107(2)                                                                                   |
| $\alpha$ (°)                                                  |                                                                 |                                                                                                                        |                                                                                                                        | 102.7197(7)                                                                                  |
| $\beta$ (°)                                                   | 99.0430(3)                                                      | 107.2742(10)                                                                                                           | 107.2684(8)                                                                                                            | 103.9060(9)                                                                                  |
| $\gamma$ (°)                                                  |                                                                 |                                                                                                                        |                                                                                                                        | 103.1252(8)                                                                                  |
| <i>V</i> (Å <sup>3</sup> )                                    | 3151.44(6)                                                      | 3945.55(14)                                                                                                            | 3944.60(10)                                                                                                            | 1871.00(5)                                                                                   |
| <i>Z</i>                                                      | 4                                                               | 4                                                                                                                      | 4                                                                                                                      | 2                                                                                            |
| Colour and habit                                              | Yellow plate                                                    | Yellow plate                                                                                                           | Yellow block                                                                                                           | Orange block                                                                                 |
| Crystal size (mm <sup>3</sup> )                               | 0.36 × 0.15 × 0.09                                              | 0.35 × 0.26 × 0.04                                                                                                     | 0.43 × 0.29 × 0.23                                                                                                     | 0.31 × 0.14 × 0.14                                                                           |
| <i>D</i> <sub>calc</sub> (g cm <sup>-3</sup> )                | 1.648                                                           | 1.807                                                                                                                  | 1.658                                                                                                                  | 1.629                                                                                        |
| $\mu$ (mm <sup>-1</sup> )                                     | 4.71                                                            | 5.78                                                                                                                   | 2.70                                                                                                                   | 1.20                                                                                         |
| Number of independent reflections ( <i>R</i> <sub>int</sub> ) | 9227 (0.052)                                                    | 4539 (0.093)                                                                                                           | 5748 (0.065)                                                                                                           | 10937 (0.032)                                                                                |
| Number of observed reflections [ <i>I</i> > 2σ( <i>I</i> )]   | 6853                                                            | 3488                                                                                                                   | 5747                                                                                                                   | 9564                                                                                         |
| Number of parameters refined                                  | 370                                                             | 260                                                                                                                    | 260                                                                                                                    | 515                                                                                          |
| <i>R</i> ( <i>F</i> <sup>2</sup> )                            | 0.025                                                           | 0.047                                                                                                                  | 0.033                                                                                                                  | 0.028                                                                                        |
| <i>R</i> <sub>w</sub> ( <i>F</i> <sup>2</sup> )               | 0.134                                                           | 0.117                                                                                                                  | 0.094                                                                                                                  | 0.069                                                                                        |
| $\rho_{\text{max}}/\rho_{\text{min}}$ (e Å <sup>-3</sup> )    | 1.71/-1.49                                                      | 2.70/-1.24                                                                                                             | 0.87/-0.71                                                                                                             | 0.49/-0.99                                                                                   |

|                                                                  | <b>9</b>                                            | <b>11</b>                                            | <b>12</b>                                                                                                         |
|------------------------------------------------------------------|-----------------------------------------------------|------------------------------------------------------|-------------------------------------------------------------------------------------------------------------------|
| Empirical formula                                                | C <sub>23</sub> H <sub>21</sub> O <sub>2</sub> PPdS | C <sub>36</sub> H <sub>29</sub> ClP <sub>2</sub> PdS | C <sub>54</sub> H <sub>42</sub> Cl <sub>3</sub> P <sub>3</sub> Pd <sub>3</sub> S <sub>3</sub> ·CH <sub>3</sub> OH |
| Formula weight                                                   | 498.86                                              | 697.49                                               | 1335.59                                                                                                           |
| Temperature (K)                                                  | 200(2)                                              | 200(2)                                               | 200(2)                                                                                                            |
| Crystal system                                                   | Monoclinic                                          | Triclinic                                            | Monoclinic                                                                                                        |
| Space group                                                      | <i>P</i> 2 <sub>1</sub> / <i>n</i>                  | <i>P</i> $\bar{1}$                                   | <i>P</i> 2 <sub>1</sub> / <i>c</i>                                                                                |
| <i>a</i> (Å)                                                     | 9.1580(2)                                           | 9.1347(1)                                            | 19.7141(2)                                                                                                        |
| <i>b</i> (Å)                                                     | 16.9618(3)                                          | 10.9341(2)                                           | 11.2461(1)                                                                                                        |
| <i>c</i> (Å)                                                     | 27.7043(6)                                          | 15.6582(3)                                           | 24.1286(2)                                                                                                        |
| $\alpha$ (°)                                                     |                                                     | 86.7318(11)                                          |                                                                                                                   |
| $\beta$ (°)                                                      | 90.7247(12)                                         | 84.7318(11)                                          | 98.3879(4)                                                                                                        |
| $\gamma$ (°)                                                     |                                                     | 76.1404(11)                                          |                                                                                                                   |
| <i>V</i> (Å <sup>3</sup> )                                       | 4303.14(15)                                         | 1511.22(4)                                           | 5292.25(8)                                                                                                        |
| <i>Z</i>                                                         | 8                                                   | 2                                                    | 4                                                                                                                 |
| Colour and habit                                                 | Yellow needle                                       | Pale yellow plate                                    | Yellow block                                                                                                      |
| Crystal size (mm <sup>3</sup> )                                  | 0.27 × 0.10 × 0.09                                  | 0.27 × 0.12 × 0.05                                   | 0.27 × 0.12 × 0.11                                                                                                |
| <i>D</i> <sub>calc</sub> (g cm <sup>-3</sup> )                   | 1.540                                               | 1.533                                                | 1.679                                                                                                             |
| $\mu$ (mm <sup>-1</sup> )                                        | 1.05                                                | 0.90                                                 | 1.41                                                                                                              |
| Number of independent reflections<br>( <i>R</i> <sub>int</sub> ) | 7579 (0.079)                                        | 8844 (0.033)                                         | 15457 (0.061)                                                                                                     |
| Number of observed reflections<br>[ <i>I</i> > 2σ( <i>I</i> )]   | 5327                                                | 7938                                                 | 13010                                                                                                             |
| Number of parameters refined                                     | 505                                                 | 370                                                  | 632                                                                                                               |
| <i>R</i> ( <i>F</i> <sup>2</sup> )                               | 0.038                                               | 0.029                                                | 0.031                                                                                                             |
| <i>R</i> <sub>w</sub> ( <i>F</i> <sup>2</sup> )                  | 0.086                                               | 0.070                                                | 0.077                                                                                                             |
| $\rho_{\max}/\rho_{\min}$ (e Å <sup>-3</sup> )                   | 1.28/-1.18                                          | 0.70/-0.83                                           | 1.50/-0.81                                                                                                        |

|                                                               | 13                                                    | 14                                                                                                              | 16                                                                                                                                        |
|---------------------------------------------------------------|-------------------------------------------------------|-----------------------------------------------------------------------------------------------------------------|-------------------------------------------------------------------------------------------------------------------------------------------|
| Empirical formula                                             | C <sub>36</sub> H <sub>29</sub> ClP <sub>2</sub> PdSe | C <sub>54</sub> H <sub>43</sub> Cl <sub>2</sub> P <sub>3</sub> Pd <sub>2</sub> Se<br>·0.376(CH <sub>3</sub> OH) | C <sub>57</sub> H <sub>49</sub> Cl <sub>2</sub> P <sub>3</sub> Pd <sub>2</sub> Se<br>·CH <sub>2</sub> Cl <sub>2</sub> ·CH <sub>3</sub> OH |
| Formula weight                                                | 744.39                                                | 1159.56                                                                                                         | 1306.58                                                                                                                                   |
| Temperature (K)                                               | 200(2)                                                | 200(2)                                                                                                          | 200(2)                                                                                                                                    |
| Crystal system                                                | Monoclinic                                            | Monoclinic                                                                                                      | Triclinic                                                                                                                                 |
| Space group                                                   | <i>P</i> 2 <sub>1</sub> / <i>n</i>                    | <i>P</i> 2 <sub>1</sub> / <i>n</i>                                                                              | <i>P</i> $\bar{1}$                                                                                                                        |
| <i>a</i> (Å)                                                  | 9.0444(2)                                             | 19.3124(2)                                                                                                      | 12.3781(2)                                                                                                                                |
| <i>b</i> (Å)                                                  | 32.6774(6)                                            | 12.3355(1)                                                                                                      | 12.4707(2)                                                                                                                                |
| <i>c</i> (Å)                                                  | 10.7989(2)                                            | 22.5574(2)                                                                                                      | 19.1951(4)                                                                                                                                |
| $\alpha$ (°)                                                  |                                                       |                                                                                                                 | 74.7759(8)                                                                                                                                |
| $\beta$ (°)                                                   | 94.9592(8)                                            | 114.9619(4)                                                                                                     | 86.7437(11)                                                                                                                               |
| $\gamma$ (°)                                                  |                                                       |                                                                                                                 | 76.0615(11)                                                                                                                               |
| <i>V</i> (Å <sup>3</sup> )                                    | 3179.64(11)                                           | 4871.83(8)                                                                                                      | 2776.81(9)                                                                                                                                |
| <i>Z</i>                                                      | 4                                                     | 4                                                                                                               | 2                                                                                                                                         |
| Colour and habit                                              | Yellow block                                          | Yellow prism                                                                                                    | Yellow plate                                                                                                                              |
| Crystal size (mm <sup>-3</sup> )                              | 0.36 × 0.18 × 0.11                                    | 0.42 × 0.20 × 0.14                                                                                              | 0.35 × 0.19 × 0.09                                                                                                                        |
| <i>D</i> <sub>calc</sub> (g cm <sup>-3</sup> )                | 1.555                                                 | 1.581                                                                                                           | 1.563                                                                                                                                     |
| $\mu$ (mm <sup>-1</sup> )                                     | 1.94                                                  | 1.73                                                                                                            | 1.62                                                                                                                                      |
| Number of independent reflections ( <i>R</i> <sub>int</sub> ) | 7249 (0.072)                                          | 14243 (0.043)                                                                                                   | 12702 (0.051)                                                                                                                             |
| Number of observed reflections [ <i>I</i> > 2σ( <i>I</i> )]   | 5460                                                  | 11684                                                                                                           | 10343                                                                                                                                     |
| Number of parameters refined                                  | 370                                                   | 578                                                                                                             | 642                                                                                                                                       |
| <i>R</i> ( <i>F</i> <sup>2</sup> )                            | 0.024                                                 | 0.028                                                                                                           | 0.038                                                                                                                                     |
| <i>R</i> <sub>w</sub> ( <i>F</i> <sup>2</sup> )               | 0.093                                                 | 0.061                                                                                                           | 0.100                                                                                                                                     |
| $\rho_{\max}/\rho_{\min}$ (e Å <sup>-3</sup> )                | 0.55/-0.66                                            | 0.85/-0.73                                                                                                      | 1.07/-1.02                                                                                                                                |

|                                                                  | <b>17</b>                                            | <b>20a</b>                                                         | <b>20b</b>                                                         |
|------------------------------------------------------------------|------------------------------------------------------|--------------------------------------------------------------------|--------------------------------------------------------------------|
| Empirical formula                                                | C <sub>32</sub> H <sub>26</sub> NO <sub>2</sub> PPdS | C <sub>31</sub> H <sub>23</sub> N <sub>2</sub> O <sub>3</sub> PPdS | C <sub>31</sub> H <sub>23</sub> N <sub>2</sub> O <sub>3</sub> PPdS |
| Formula weight                                                   | 626.00                                               | 687.87                                                             | 687.87                                                             |
| Temperature (K)                                                  | 200(2)                                               | 200(2)                                                             | 200(2)                                                             |
| Crystal system                                                   | Triclinic                                            | Triclinic                                                          | Monoclinic                                                         |
| Space group                                                      | $P\bar{1}$                                           | $P\bar{1}$                                                         | $P2_1/n$                                                           |
| <i>a</i> (Å)                                                     | 10.2542(2)                                           | 8.2026(2)                                                          | 13.0481(2)                                                         |
| <i>b</i> (Å)                                                     | 11.4908(2)                                           | 11.3200(3)                                                         | 9.1069(2)                                                          |
| <i>c</i> (Å)                                                     | 12.9393(3)                                           | 15.5766(4)                                                         | 23.0277(3)                                                         |
| $\alpha$ (°)                                                     | 106.1144(9)                                          | 81.6051(12)                                                        |                                                                    |
| $\beta$ (°)                                                      | 109.7145(12)                                         | 84.9680(17)                                                        | 91.5870(11)                                                        |
| $\gamma$ (°)                                                     | 96.5437(12)                                          | 71.6954(16)                                                        |                                                                    |
| <i>V</i> (Å <sup>3</sup> )                                       | 1342.05(5)                                           | 1357.09(6)                                                         | 2735.28(8)                                                         |
| <i>Z</i>                                                         | 2                                                    | 2                                                                  | 4                                                                  |
| Colour and habit                                                 | Yellow block                                         | Yellow block                                                       | Orange needle                                                      |
| Crystal size (mm <sup>3</sup> )                                  | 0.34 × 0.14 × 0.08                                   | 0.20 × 0.11 × 0.06                                                 | 0.37 × 0.04 × 0.02                                                 |
| <i>D</i> <sub>calc</sub> (g cm <sup>-3</sup> )                   | 1.549                                                | 1.683                                                              | 1.670                                                              |
| $\mu$ (mm <sup>-1</sup> )                                        | 0.86                                                 | 2.12                                                               | 2.10                                                               |
| Number of independent reflections<br>( <i>R</i> <sub>int</sub> ) | 6148 (0.038)                                         | 6216 (0.060)                                                       | 5392 (0.079)                                                       |
| Number of observed reflections<br>[ <i>I</i> > 2σ( <i>I</i> )]   | 5466                                                 | 5068                                                               | 4351                                                               |
| Number of parameters refined                                     | 421                                                  | 421                                                                | 352                                                                |
| <i>R</i> ( <i>F</i> <sup>2</sup> )                               | 0.027                                                | 0.031                                                              | 0.031                                                              |
| <i>R</i> <sub>w</sub> ( <i>F</i> <sup>2</sup> )                  | 0.067                                                | 0.068                                                              | 0.067                                                              |
| $\rho_{\max}/\rho_{\min}$ (e Å <sup>-3</sup> )                   | 0.47/-0.72                                           | 0.64/-0.81                                                         | 0.82/-0.85                                                         |
